# Supplementary material for: An electron-deficient supramolecular macrocyclic host for the selective separation of aromatics and cyclic aliphatics
Source: Royal Society of Chemistry journal article supplement (doi:10.1039/d2qo01019d), 2022-01-01
Supplement: d2qo01019d1.pdf [file d2qo01019d1.pdf]

## Electronic Supplementary Information

### Electron-Deficient Supramolecular Macrocyclic Host for the Selective Separation of Aromatics and Cyclic Aliphatics

Fei Zeng,<sup>a\*</sup> Xin-Sheng Xiao,<sup>a</sup> Shao-Feng Gong,<sup>a</sup> \* Lin Yuan,<sup>a</sup> and Lin-Li Tang<sup>a</sup>

<sup>a</sup>Department of Biology and Chemistry, Hunan University of Science and Engineering, Yongzhou 425199, China.

*E-mail: zengfei@iccas.ac.cn*

#### Contents

|                                                                               |    |
|-------------------------------------------------------------------------------|----|
| 1. Materials and Methods.....                                                 | S2 |
| 2. Synthesis of New compounds. ....                                           | S2 |
| 3. <sup>1</sup> H NMR and <sup>13</sup> C NMR Spectral of New compounds. .... | S4 |
| 4. Thermogravimetric analysis of host 1.....                                  | S6 |
| 5. Stability test .....                                                       | S6 |
| 6. Photos of prepared column .....                                            | S7 |
| 7. Crystal data for 1 .....                                                   | S7 |
| 8. Crystal data (PhH) <sub>2</sub> @1.....                                    | S8 |
| 9. Crystal data for Tol <sub>2</sub> @1. ....                                 | S9 |
| 10. Determination of the Association Constants of the Complexes. ....         | S9 |

## 1. Materials and Methods.

All reactions were carried out with oven-dried glassware. Commercial reagents were used without further purification. Flash column chromatography was performed on 100-200 mesh silica gel.  $^1\text{H}$  NMR,  $^{13}\text{C}$  NMR spectra were recorded on a Bruker DMX400 NMR spectrometer. Melting points were determined using WRR melting point apparatus and were uncorrected. High-resolution mass spectra (HRMS) were determined on Bruker Daltonics Inc. APEXIII 7.0 TESLA FTMS. The single crystal X-ray data were measured by direct methods using Bruker SMART APEX II.

**Thermogravimetric analysis (TGA)** was carried out using a Q5000IR analyzer (TA Instruments) with an automated vertical overhead thermobalance. The samples were heated at  $10\text{ }^\circ\text{C}/\text{min}$  using  $\text{N}_2$  as the protective gas.

### Column packing procedure for GC separation.

The host **1** packed column was prepared by manual filling. The **host 1** (100 mg) was first dissolved in 15 mL chloroform, then 2g 40-60 mesh red carrier 6201 was added. The above mixture was dried under vacuo and the residue was dried at  $120\text{ }^\circ\text{C}$  for another 4 h. Carrier that loaded with host **1** was packed into a 1.0 m long, 2.0 mm i.d. stainless steel column. During the filling process, the column was continuously tapped and the packing was compacted, and then the host **1** packed column was obtained. After the column was loaded into the column box, it was activated under  $120\text{ }^\circ\text{C}$  for 12 hours before use. GC experiments were performed on the Fuli 9790II GC system, the flow rate of carrier gas was  $25\text{ ml}/\text{min}$ , the injection volume of sample was  $0.1\text{ }\mu\text{L}$ .

## 2. Synthesis of New compounds.

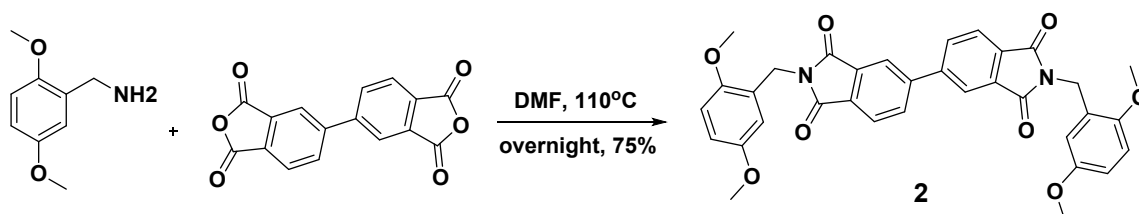

**Compound 2** 3,3',4,4'-biphenyltetracarboxylic dianhydride (1.47 g, 5 mmol) and 2,5-dimethoxybenzylamine (2.01 g, 12 mmol) were dissolved with anhydrous DMF (35 mL) in a sealed tube and then heated at 110 °C for 12 h on an oil bath. After being cooled to room temperature, the reaction mixture was poured into the water and the resulting yellow-green precipitate was washed with water and then dried under vacuum to afford compound **2** (2.22 g, yield 75%) as yellow solid. M.p.: >300 °C. <sup>1</sup>H NMR (400 MHz, Chloroform-*d*) δ 8.11 (s, 2H), 7.99 (d, *J* = 7.9 Hz, 4H), 6.81 (d, *J* = 9.9 Hz, 2H), 6.76 (d, *J* = 6.7 Hz, 4H), 4.92 (s, 4H), 3.83 (s, 6H), 3.73 (s, 6H). <sup>13</sup>C NMR (101 MHz, CDCl<sub>3</sub>) δ 167.53, 153.47, 151.37, 145.18, 133.37, 132.94, 131.94, 125.18, 124.18, 122.20, 115.15, 112.56, 111.49, 56.11, 55.73, 37.07. HRMS (APCI) *m/z*: [M+H]<sup>+</sup> calcd for C<sub>34</sub>H<sub>29</sub>N<sub>2</sub>O<sub>8</sub>, 593.1924; found, 593.1928.

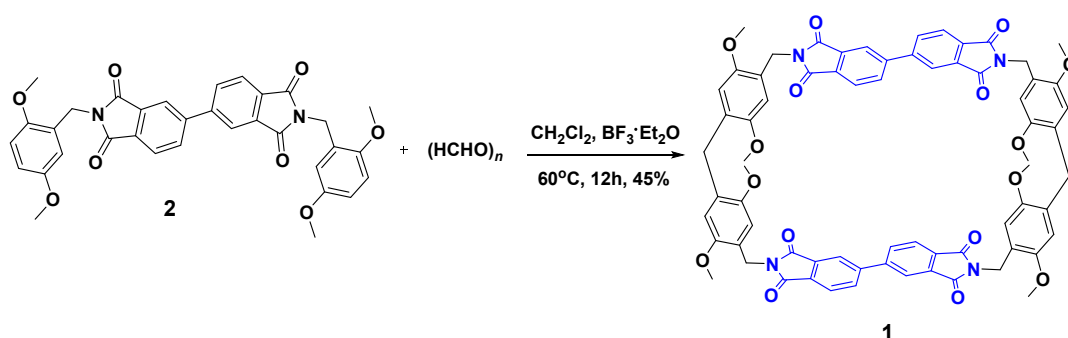

**Host 1** To a mixture of **2** (1.18 g, 2.0 mmol) and paraformaldehyde (180 mg, 6.0 mmol) in dichloromethane (150 mL) was added boron trifluoride diethyl etherate (0.3 mL, 2.4 mmol). The mixture was stirred at 60 °C for 12 h. Then the reaction was quenched by the addition of 150 mL water. The organic layer was separated and dried with anhydrous MgSO<sub>4</sub>. The solvent was removed in vacuo and the residue was separated by column chromatography on silica gel (eluent: 1:15 ethyl acetate /DCM) to give **1** (544 mg, 45%) as yellow-green solids. M.p.: >300 °C. <sup>1</sup>H NMR (400 MHz, Chloroform-*d*) δ 7.96 (s, 4H), 7.86 (t, *J* = 5.9 Hz, 8H), 6.90 (s, 4H), 6.69 (s, 4H), 4.85 (s, 8H), 3.87 (s, 4H), 3.76 (s, 12H), 3.69 (s, 12H). <sup>13</sup>C NMR (101 MHz, CDCl<sub>3</sub>) δ 167.56, 167.19, 151.26, 144.92, 133.32, 132.68, 131.86, 129.86, 123.88, 122.17, 121.80, 114.26, 113.50, 56.30, 56.11, 37.36,

30.23. HRMS (APCI)  $m/z$ :  $[M+H]^+$  calcd for  $C_{70}H_{57}N_4O_{16}$ , 1209.3770; found, 1209.3784.

### 3. $^1H$ NMR and $^{13}C$ NMR Spectral of New compounds.

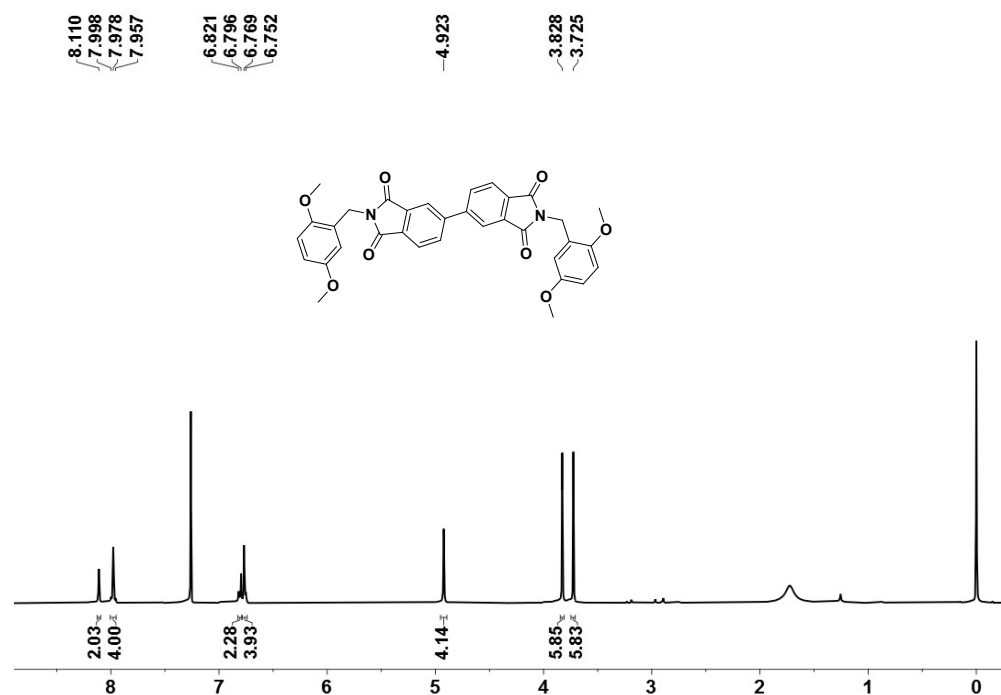

Figure S1.  $^1H$  NMR spectrum (400 MHz,  $CDCl_3$ , 298K) of **2**.

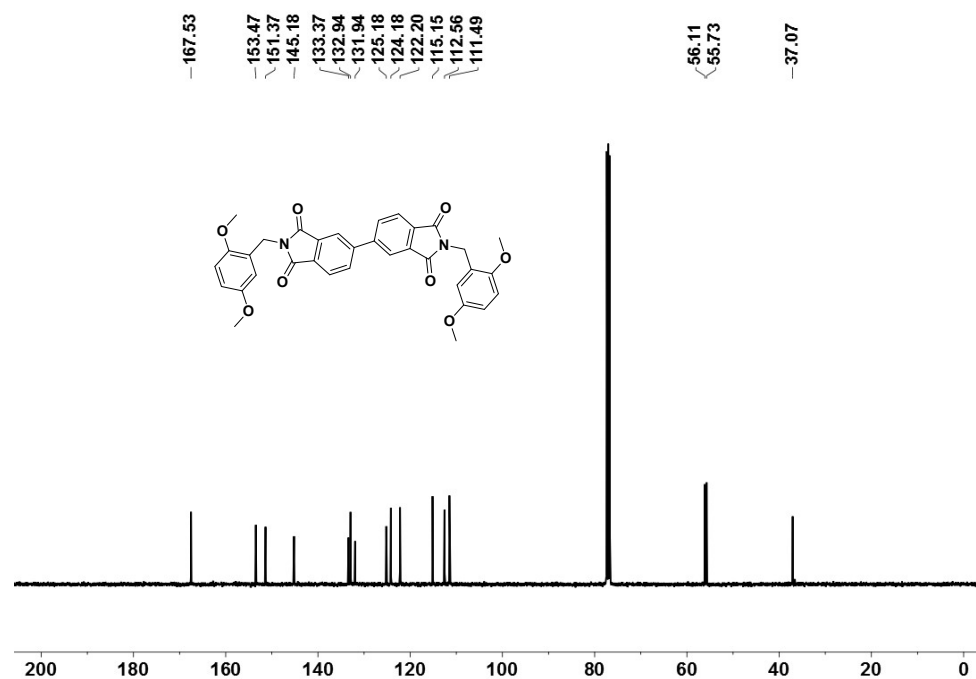

Figure S2.  $^{13}C$  NMR spectrum (101 MHz,  $CDCl_3$ , 298K) of **2**.

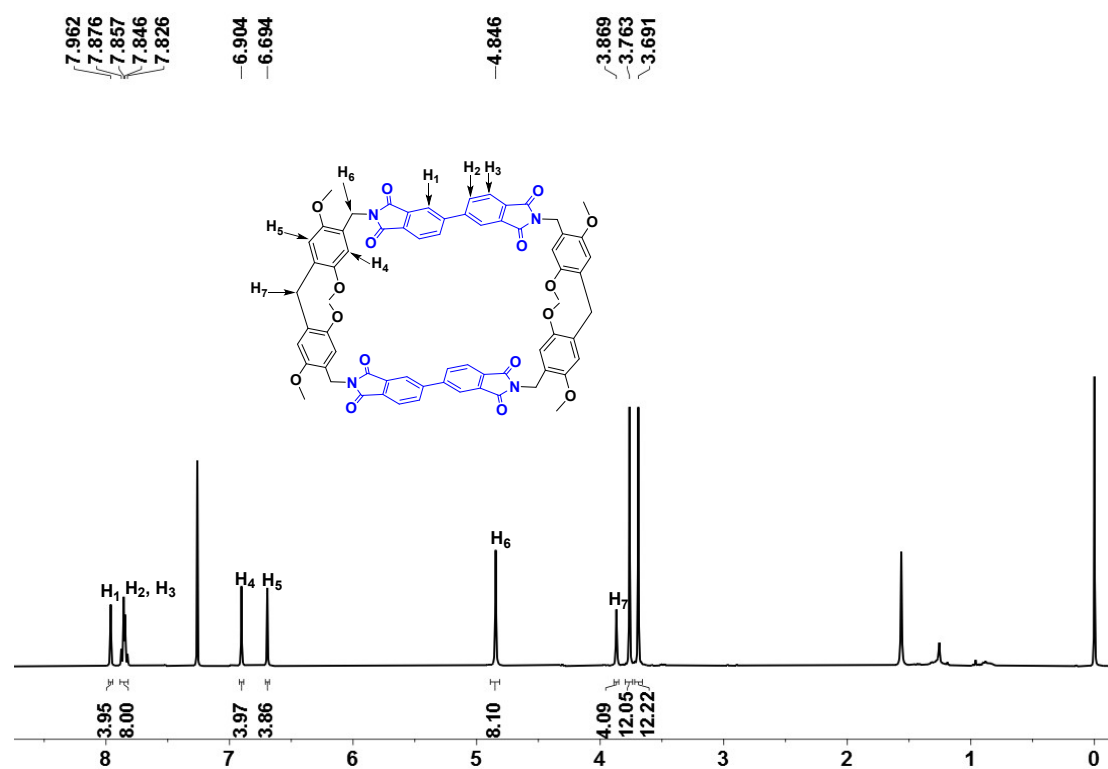

**Figure S3.** <sup>1</sup>H NMR spectrum (400 MHz, CDCl<sub>3</sub>, 298K) of host 1.

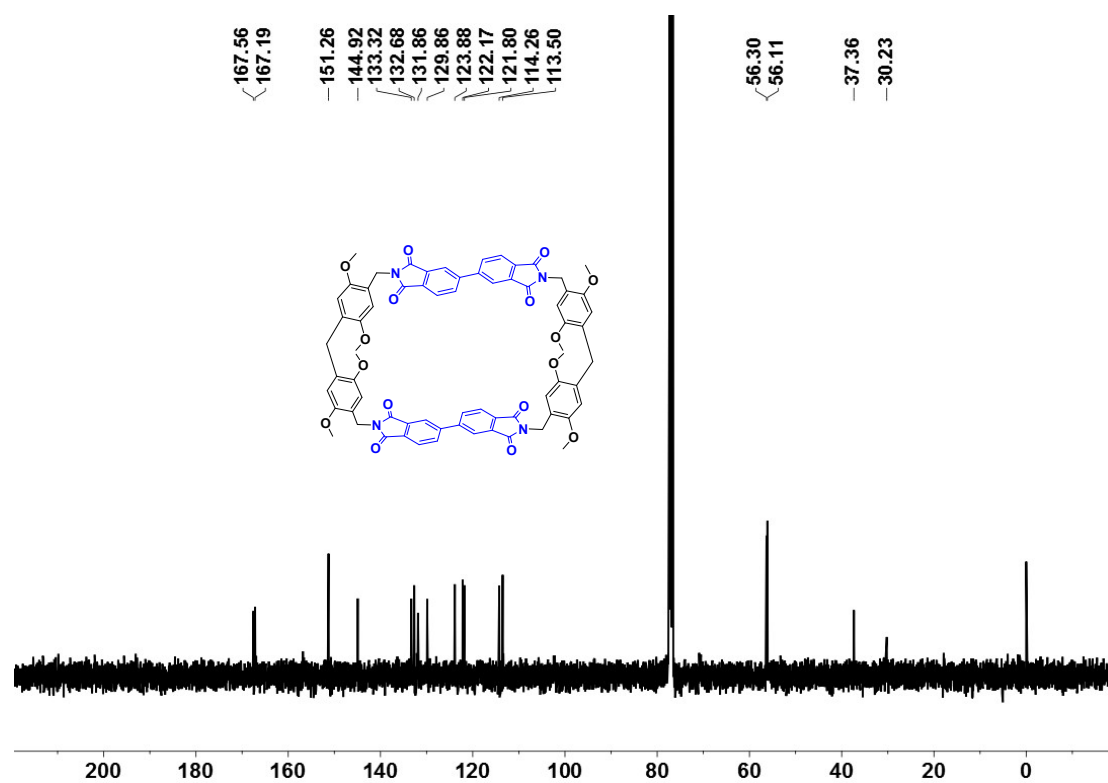

**Figure S4.** <sup>13</sup>C NMR spectrum (101 MHz, CDCl<sub>3</sub>, 298K) of host 1.

#### 4. Thermogravimetric analysis of host 1

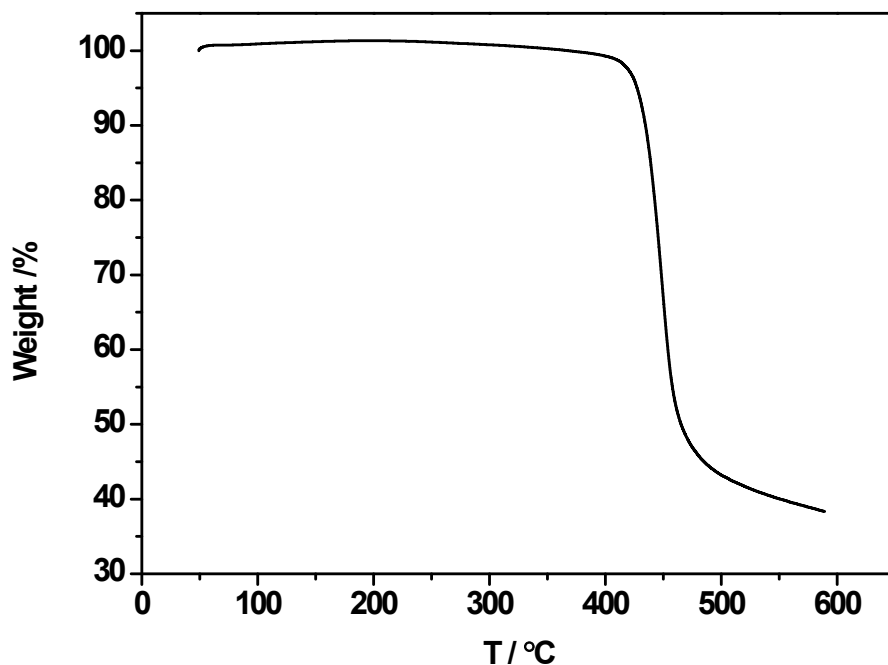

Figure S5. Thermogravimetric analysis of **1**.

#### 5. Stability test

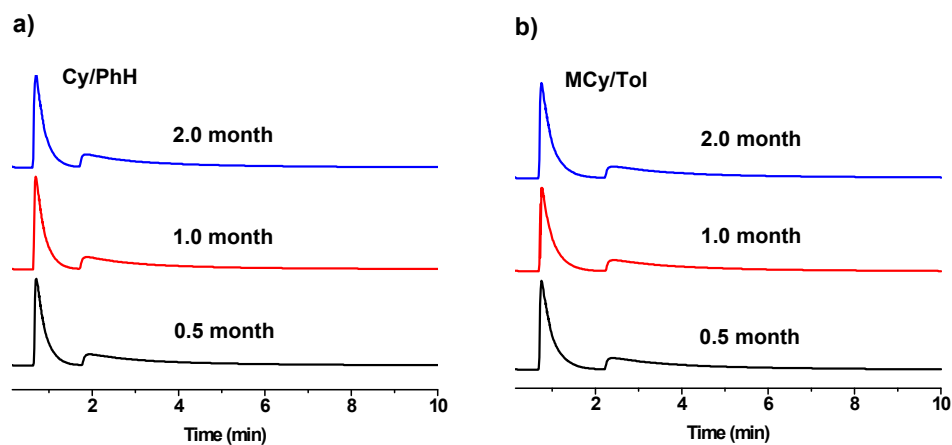

Figure S6. GC chromatograms of (a) cyclohexane/benzene (1/1, V/V) and (b) methylcyclohexane/toluene (1/1, V/V) on the **host 1** packed column obtained after two months on the same column using the same conditions, respectively.

## 6. Photos of prepared column

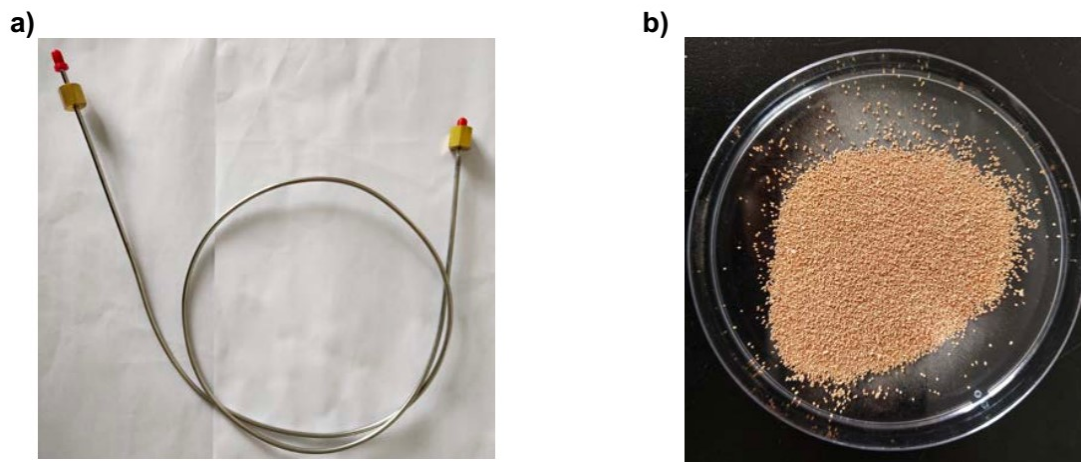

**Figure S7.** (a) photo of host **1** packed column. (b) red carrier 6201 that loaded 5% wt host **1**.

## 7. Crystal data for **1**

|                                                |                                      |
|------------------------------------------------|--------------------------------------|
| Identification code                            | 11_a                                 |
| Empirical formula                              | $C_{36}H_{29}Cl_3N_2O_8$             |
| Formula weight                                 | 723.96                               |
| Temperature/K                                  | 296.15                               |
| Crystal system                                 | triclinic                            |
| Space group                                    | P-1                                  |
| $a/\text{\AA}$                                 | 9.344(6)                             |
| $b/\text{\AA}$                                 | 12.709(8)                            |
| $c/\text{\AA}$                                 | 15.488(9)                            |
| $\alpha/^\circ$                                | 77.638(6)                            |
| $\beta/^\circ$                                 | 80.102(6)                            |
| $\gamma/^\circ$                                | 87.490(6)                            |
| Volume/ $\text{\AA}^3$                         | 1769.8(19)                           |
| Z                                              | 2                                    |
| $\rho_{\text{calc}}/\text{g/cm}^3$             | 1.358                                |
| $\mu/\text{mm}^{-1}$                           | 0.312                                |
| F(000)                                         | 748.0                                |
| Crystal size/ $\text{mm}^3$                    | $0.42 \times 0.23 \times 0.15$       |
| Radiation                                      | MoK $\alpha$ ( $\lambda = 0.71073$ ) |
| 2 $\theta$ range for data collection/ $^\circ$ | 2.73 to 55.214                       |

|                                                |                                                               |
|------------------------------------------------|---------------------------------------------------------------|
| Index ranges                                   | -12 ≤ h ≤ 12, -16 ≤ k ≤ 16, -20 ≤ l ≤ 19                      |
| Reflections collected                          | 16687                                                         |
| Independent reflections                        | 7737 [R <sub>int</sub> = 0.0430, R <sub>sigma</sub> = 0.0744] |
| Data/restraints/parameters                     | 7737/0/446                                                    |
| Goodness-of-fit on F <sup>2</sup>              | 1.034                                                         |
| Final R indexes [I ≥ 2σ<br>(I)]                | R <sub>1</sub> = 0.0871, wR <sub>2</sub> = 0.2421             |
| Final R indexes [all data]                     | R <sub>1</sub> = 0.1661, wR <sub>2</sub> = 0.3003             |
| Largest diff. peak/hole / e<br>Å <sup>-3</sup> | 0.73/-0.66                                                    |

## 8. Crystal data (PhH)<sub>2</sub>@1

|                                             |                                                                |
|---------------------------------------------|----------------------------------------------------------------|
| Identification code                         | 11                                                             |
| Empirical formula                           | C <sub>82</sub> H <sub>70</sub> N <sub>4</sub> O <sub>16</sub> |
| Formula weight                              | 1367.42                                                        |
| Temperature/K                               | 296.15                                                         |
| Crystal system                              | triclinic                                                      |
| Space group                                 | P-1                                                            |
| a/Å                                         | 9.468(7)                                                       |
| b/Å                                         | 13.913(10)                                                     |
| c/Å                                         | 16.060(12)                                                     |
| α/°                                         | 96.956(10)                                                     |
| β/°                                         | 95.231(10)                                                     |
| γ/°                                         | 94.568(9)                                                      |
| Volume/Å <sup>3</sup>                       | 2083(3)                                                        |
| Z                                           | 1                                                              |
| ρ <sub>calc</sub> /g/cm <sup>3</sup>        | 1.090                                                          |
| μ/mm <sup>-1</sup>                          | 0.076                                                          |
| F(000)                                      | 718.0                                                          |
| Crystal size/mm <sup>3</sup>                | ? × ? × ?                                                      |
| Radiation                                   | MoKα (λ = 0.71073)                                             |
| 2θ range for data collection/°              | 2.962 to 52.99                                                 |
| Index ranges                                | -11 ≤ h ≤ 11, -17 ≤ k ≤ 17, -20 ≤ l ≤ 20                       |
| Reflections collected                       | 22184                                                          |
| Independent reflections                     | 8537 [R <sub>int</sub> = 0.0392, R <sub>sigma</sub> = 0.0565]  |
| Data/restraints/parameters                  | 8537/252/494                                                   |
| Goodness-of-fit on F <sup>2</sup>           | 0.968                                                          |
| Final R indexes [I >= 2σ (I)]               | R <sub>1</sub> = 0.0731, wR <sub>2</sub> = 0.2016              |
| Final R indexes [all data]                  | R <sub>1</sub> = 0.1204, wR <sub>2</sub> = 0.2413              |
| Largest diff. peak/hole / e Å <sup>-3</sup> | 0.55/-0.25                                                     |

## 9. Crystal data for Tol<sub>2</sub>@1.

|                     |                                                                |
|---------------------|----------------------------------------------------------------|
| Identification code | 22050921                                                       |
| Empirical formula   | C <sub>84</sub> H <sub>72</sub> N <sub>4</sub> O <sub>16</sub> |
| Formula weight      | 1393.45                                                        |
| Temperature/K       | 293(2)                                                         |
| Crystal system      | triclinic                                                      |

|                                                |                                                                |
|------------------------------------------------|----------------------------------------------------------------|
| Space group                                    | P-1                                                            |
| a/Å                                            | 9.332(3)                                                       |
| b/Å                                            | 12.278(3)                                                      |
| c/Å                                            | 15.500(3)                                                      |
| $\alpha/^\circ$                                | 77.024(17)                                                     |
| $\beta/^\circ$                                 | 82.21(2)                                                       |
| $\gamma/^\circ$                                | 86.73(2)                                                       |
| Volume/Å <sup>3</sup>                          | 1713.9(7)                                                      |
| Z                                              | 1                                                              |
| $\rho_{\text{calc}}/\text{g}/\text{cm}^3$      | 1.350                                                          |
| $\mu/\text{mm}^{-1}$                           | 0.094                                                          |
| F(000)                                         | 732.0                                                          |
| Crystal size/mm <sup>3</sup>                   | ? × ? × ?                                                      |
| Radiation                                      | MoK $\alpha$ ( $\lambda$ = 0.71073)                            |
| 2 $\theta$ range for data collection/ $^\circ$ | 3.406 to 49.996                                                |
| Index ranges                                   | -11 ≤ h ≤ 11, -14 ≤ k ≤ 14, -18 ≤ l ≤ 18                       |
| Reflections collected                          | 15483                                                          |
| Independent reflections                        | 5994 [ $R_{\text{int}}$ = 0.1135, $R_{\text{sigma}}$ = 0.1576] |
| Data/restraints/parameters                     | 5994/202/490                                                   |
| Goodness-of-fit on F <sup>2</sup>              | 1.078                                                          |
| Final R indexes [ $I \geq 2\sigma(I)$ ]        | $R_1$ = 0.1199, $wR_2$ = 0.2695                                |
| Final R indexes [all data]                     | $R_1$ = 0.2770, $wR_2$ = 0.3469                                |
| Largest diff. peak/hole / e Å <sup>-3</sup>    | 0.43/-0.36                                                     |

## 10. Determination of the Association Constants of the Complexes.

In the <sup>1</sup>H NMR titrations, CDCl<sub>3</sub> was chosen to dissolve the host and the guests. Chemical shifts were reported in parts per million (*ppm*). By a mole ratio plot, each stoichiometry was determined. Titration curve-fitting and association constant values were calculated by employing the BindFit program developed by Prof. Pall Thordarson of UNSW. 1:2 Binding stoichiometry was chosen in the BindFit program. This program employs a nonlinear least-squares regression analysis and is available free of cost online through the following link: <http://supramolecular.org>.

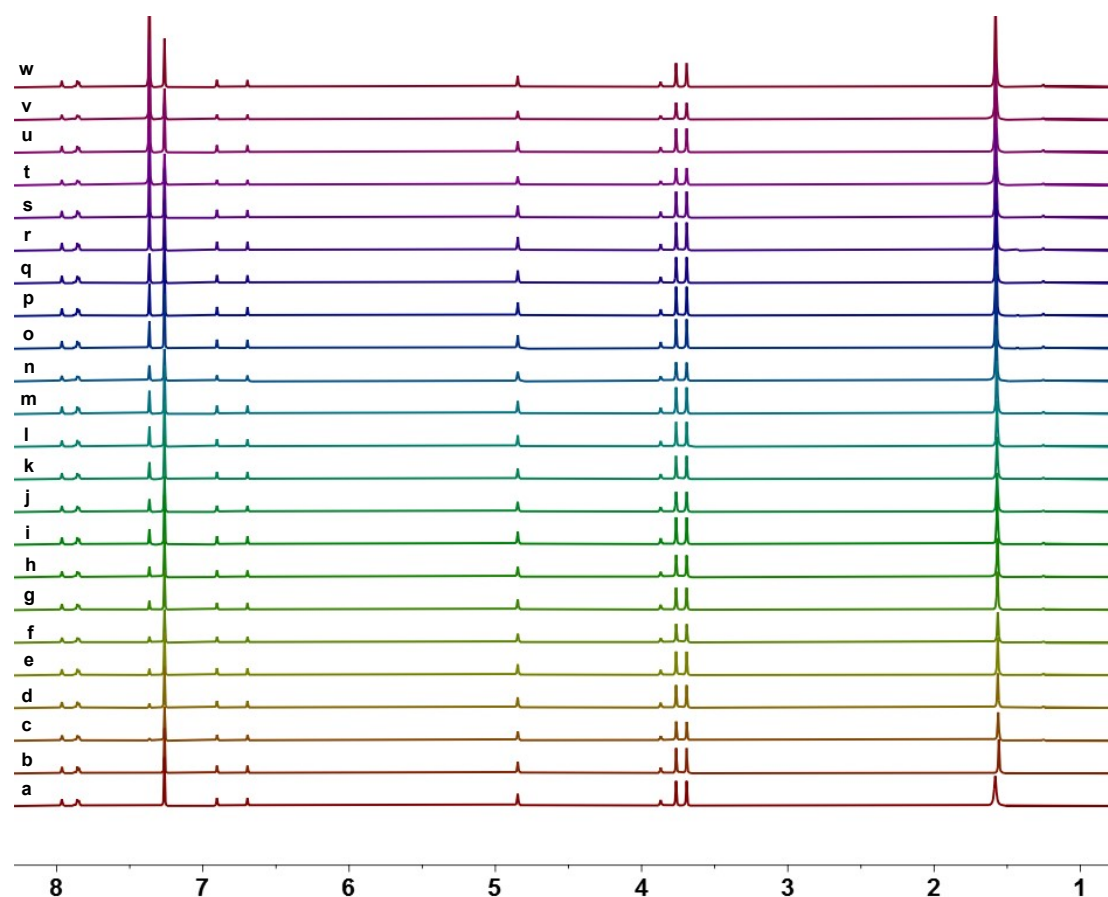

**Figure S8.**  $^1\text{H}$  NMR spectra (400 MHz,  $\text{CDCl}_3$ , v/v, 298 K) of **1** at a concentration of 1.0 mM with different concentrations of **PhH**: (a) 0.00 mM; (b) 0.2 mM; (c) 0.4 mM; (d) 0.6 mM; (e) 0.8 mM; (f) 1.0 mM; (g) 1.2 mM; (h) 1.4 mM; (i) 1.6mM; (j) 1.8 mM; (k) 2.0 mM; (l) 2.2 mM; (m) 2.4 mM; (n) 2.6 mM; (o) 2.8 mM; (p) 3.0 mM; (q) 3.2 mM; (r) 4.0 mM; (s) 6.0 mM; (t) 8.0 mM; (u) 10.0 mM; (v) 30.0 mM; (w) 50.0 mM.

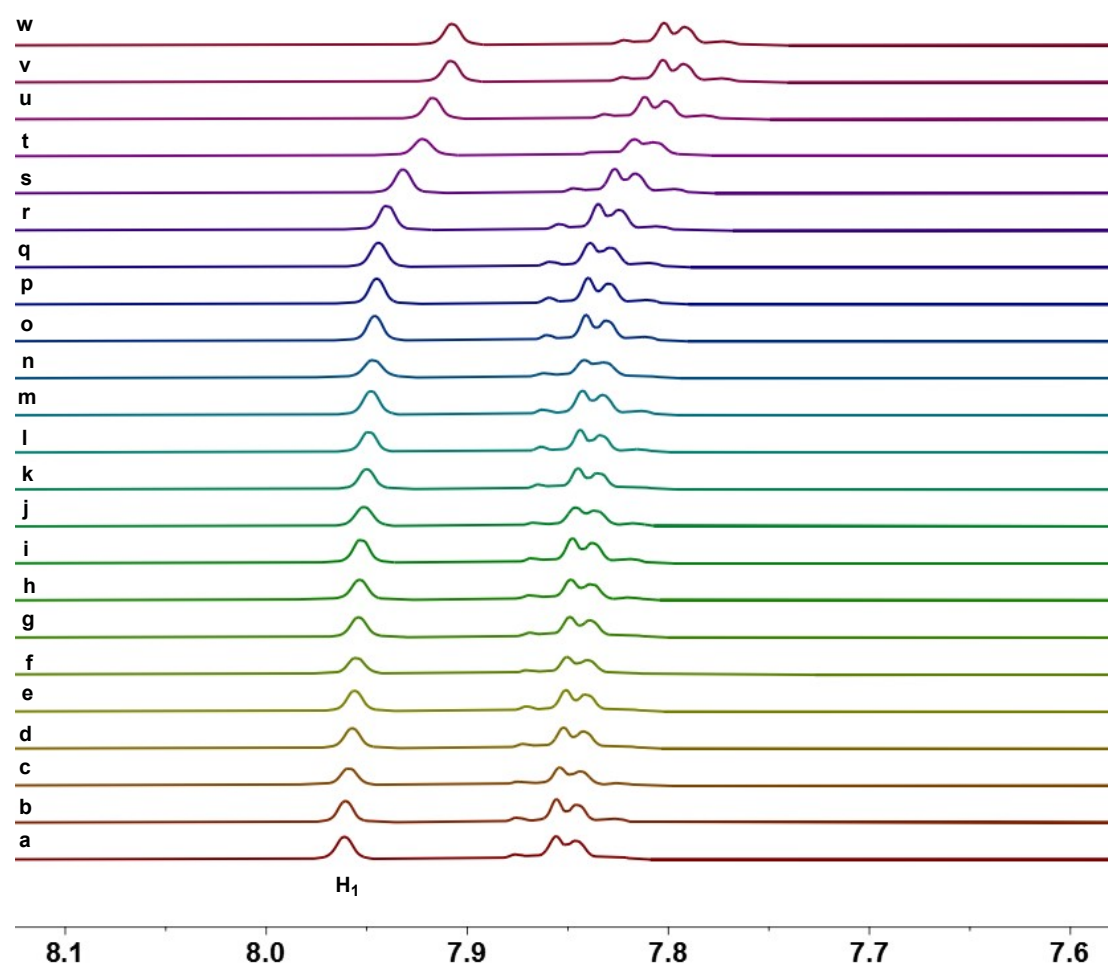

**Figure S9. Zoomed in view of Figure S8**

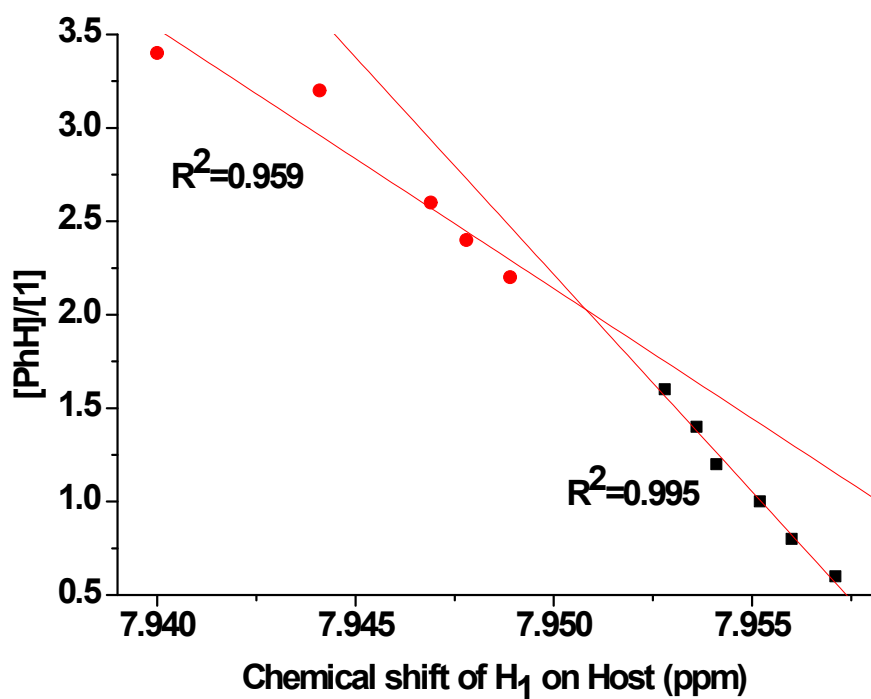

**Figure S10.** Mole ratio plot of the complexation of **1** and PhH in CDCl<sub>3</sub> at 298 K.

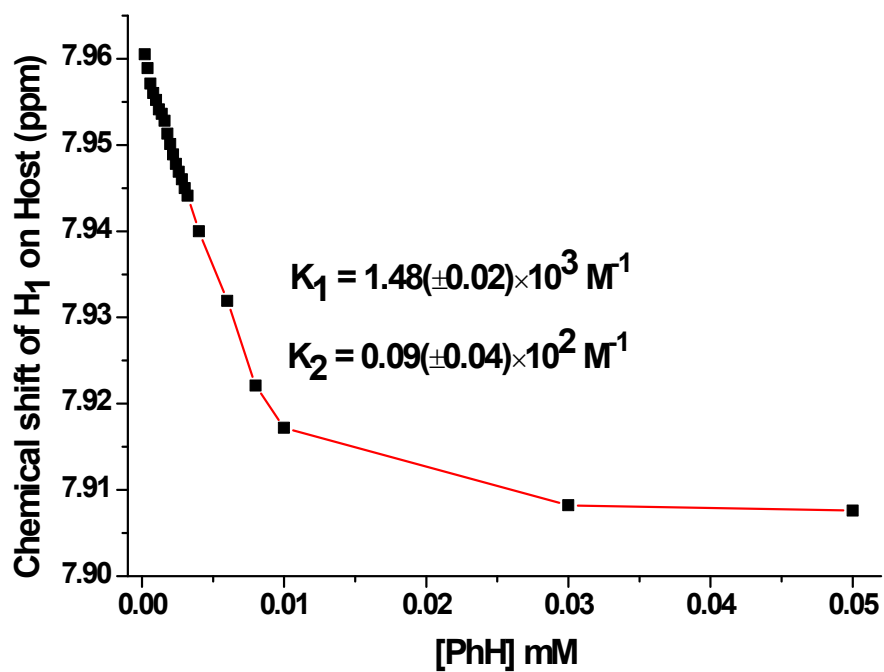

**Figure S11.** Plot of chemical shift (ppm) for the H<sub>1</sub> of **1** and PhH in CDCl<sub>3</sub> at 298 K.

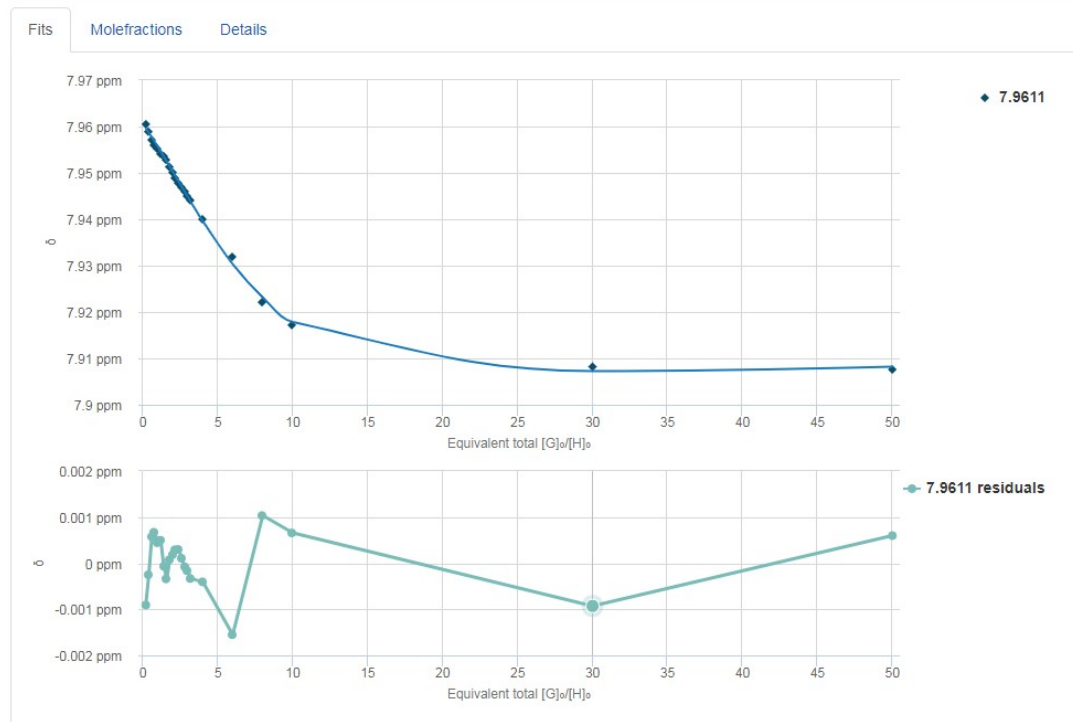

**Figure S12.** Screenshot of data fit for  $(\text{PhH})_2@1$

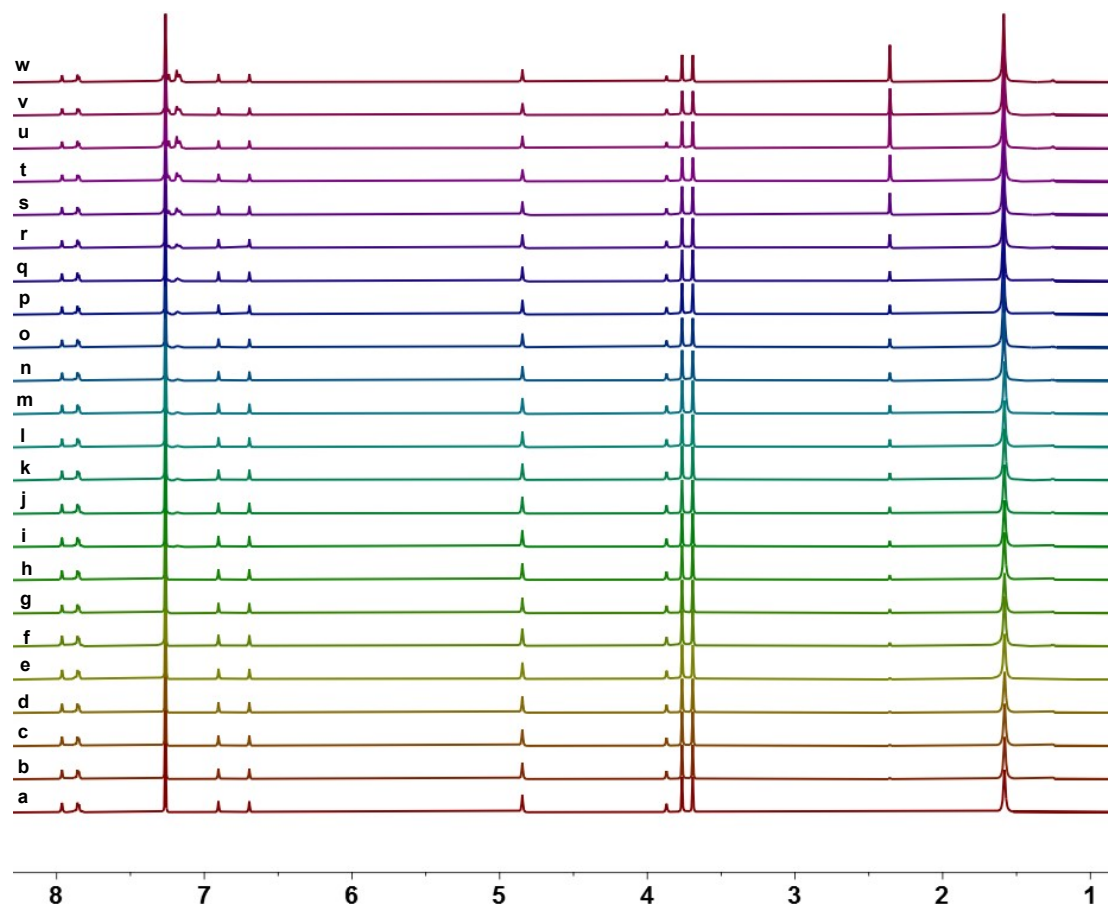

**Figure S13.**  $^1\text{H}$  NMR spectra (400 MHz,  $\text{CDCl}_3$ , v/v, 298 K) of **1** at a concentration

of 1.0 mM with different concentrations of **Tol**: (a) 0.00 mM; (b) 0.2 mM; (c) 0.4 mM; (d) 0.6 mM; (e) 0.8 mM; (f) 1.0 mM; (g) 1.2 mM; (h) 1.4 mM; (i) 1.6mM; (j) 1.8 mM; (k) 2.0 mM; (l) 2.2 mM; (m) 2.4 mM; (n) 2.6 mM; (o) 2.8 mM; (p)3.0 mM; (q) 3.2 mM; (r) 4.0 mM; (s) 6.0 mM; (t) 8.0 mM; (u) 10.0 mM; (v) 30.0 mM; (w) 50.0 mM.

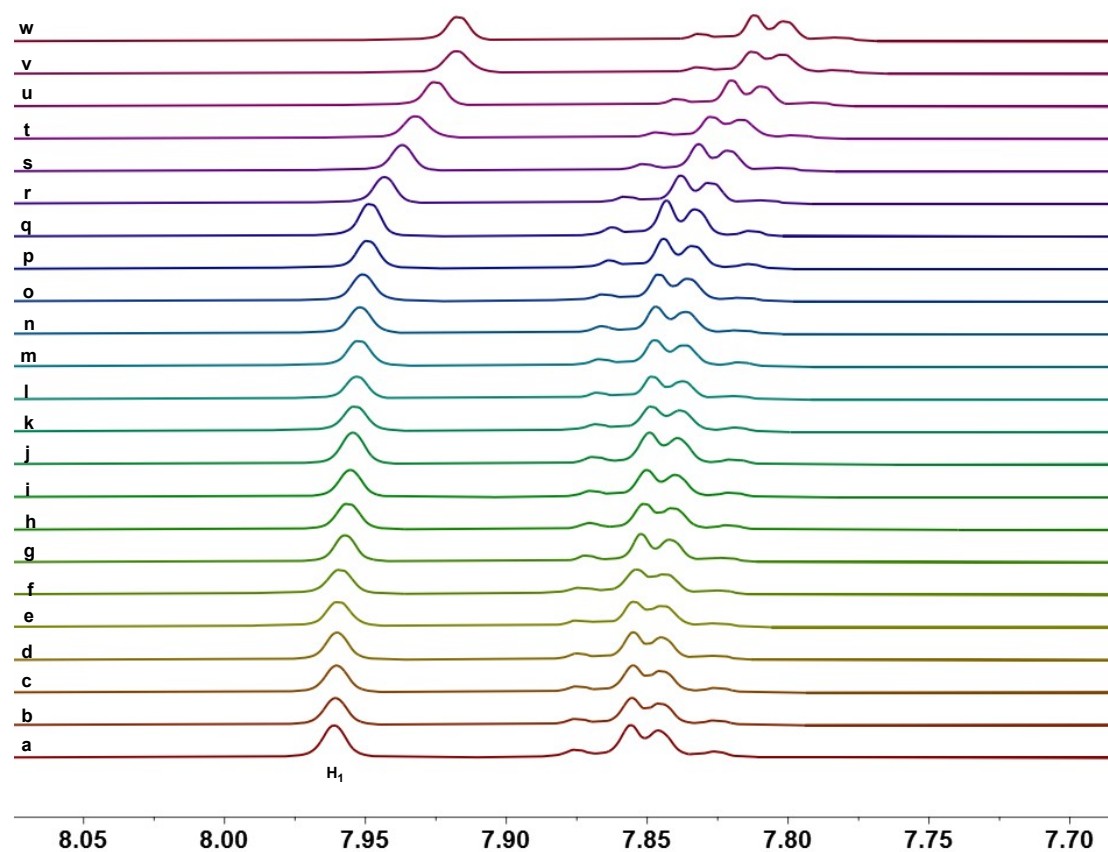

**Figure S14. Zoomed in view of Figure S13**

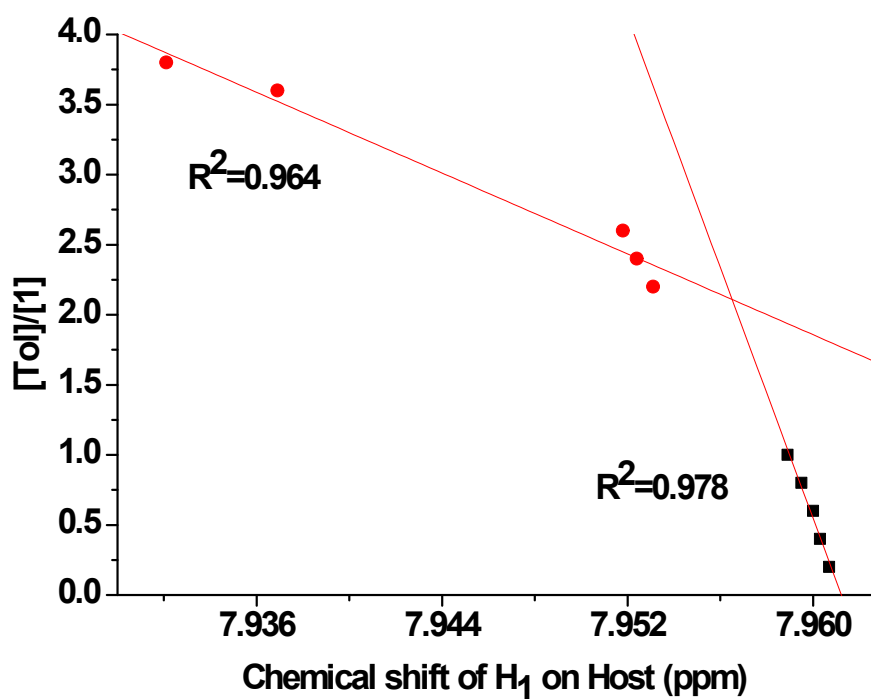

**Figure S15.** Mole ratio plot of the complexation of **1** and **Tol** in  $CDCl_3$  at 298 K.

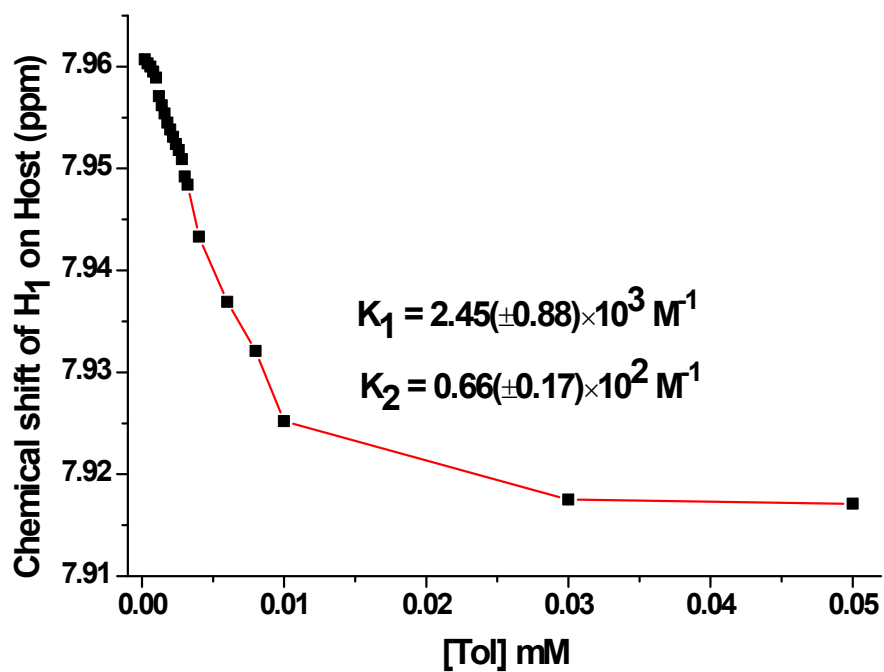

**Figure S16.** Plot of chemical shift (ppm) for the  $H_1$  of **1** and **Tol** in  $CDCl_3$  at 298 K.

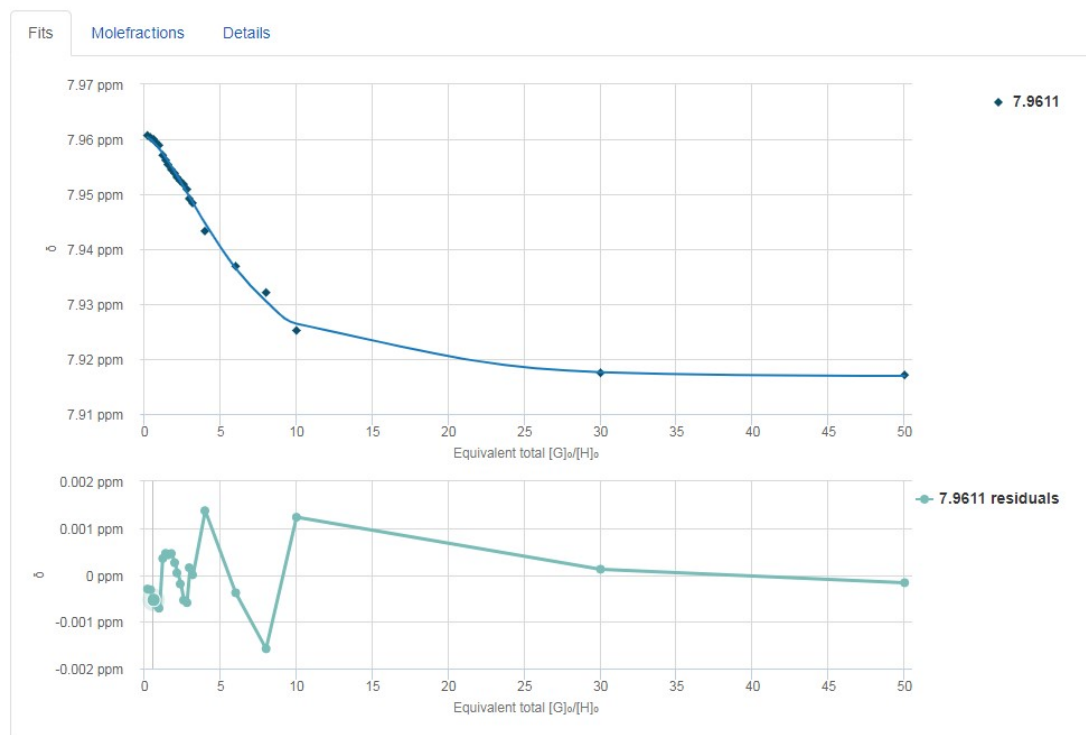

**Figure S17. Screenshot of data fit for Tol<sub>2</sub>@1**
